# Supplementary material
Source: PubMed Central journal article supplement (PMC7197444)
Supplement: NIHMS1048200-supplement-Supp_TableS1-4.pdf [file NIHMS1048200-supplement-Supp_TableS1-4.pdf]

**Table S1.** Patient/clinical variables by sequence urotype

| Patient and Clinical Variables                   | Total Cohort (N=224) | <i>Lactobacillus</i> Urotype (N = 57) | Bifidobacteriaceae# Urotype (N=9) | Enterobacteriaceae# Urotype (N=10) | Other* Urotype (N=8) | Mixed Urotype (N=57)    | Sequence Negative Urotype (N=83) |
|--------------------------------------------------|----------------------|---------------------------------------|-----------------------------------|------------------------------------|----------------------|-------------------------|----------------------------------|
| Age (years), mean (SD) <sup>a</sup>              | 48 (14)              | 45 (13)<br>[0.03]                     | 41 (15)                           | 57 (14)<br>[0.04]                  | 46 (13)              | 48 (14)                 | 50 (13)                          |
| Race:                                            |                      |                                       |                                   |                                    |                      |                         |                                  |
| -White/Caucasian                                 | 148 (66%)            | 36 (63%)                              | 5 (56%)                           | 9 (90%)                            | 5 (63%)              | 33 (58%)                | 60 (72%)                         |
| -Black/African American                          | 53 (24%)             | 16 (28%)                              | 3 (33%)                           | 0 (0%)                             | 3 (37%)              | 17 (30%)                | 14 (17%)                         |
| -Asian                                           | 9 (4%)               | 2 (4%)                                | 0 (0%)                            | 0 (0%)                             | 0 (0%)               | 3 (5%)                  | 4 (5%)                           |
| -NHPI                                            | 1 (0%)               | 1 (2%)                                | 0 (0%)                            | 0 (0%)                             | 0 (0%)               | 0 (0%)                  | 0 (0%)                           |
| -Other                                           | 13 (6%)              | 2 (4%)                                | 1 (11%)                           | 1 (10%)                            | 0 (0%)               | 4 (7%)                  | 5 (6%)                           |
| Ethnicity:                                       |                      |                                       |                                   |                                    |                      |                         |                                  |
| -Hispanic or Latina                              | 28 (12%)             | 3 (5%)                                | 3 (33%)                           | 2 (20%)                            | 2 (25%)              | 11 (19%)                | 7 (8%)                           |
| -Not Hispanic or Latina                          | 196 (88%)            | 54 (95%)                              | 6 (67%)                           | 8 (80%)                            | 6 (75%)              | 46 (81%)                | 76 (92%)                         |
| BMI (kg/m <sup>2</sup> ), mean (SD) <sup>a</sup> | 29.96 (7.73)         | 29.74 (6.25)                          | 34.96 (11.44)<br>[0.04]           | 31.89 (7.2)                        | 31.00 (6.43)         | 32.78 (9.62)<br>[0.001] | 27.29 (5.87)<br>[<0.001]         |
| Vaginal Parity, median (IQR) <sup>c</sup>        | 2 (0-3)              | 2 (0-2)<br>(N=40)                     | 1 (0-2)<br>(N=7)                  | 2 (1-2)<br>(N=7)                   | 2 (0-2)<br>(N=3)     | 1 (0-3)<br>(N=38)       | 2 (1-3)<br>(N=51)                |
| Engage in Vaginal Intercourse (N=146)            | 92 (63%)             | 30 (75%)                              | 4 (57%)                           | 2 (29%)                            | 3 (100%)             | 25 (66%)                | 25 (49%) [0.01]                  |
| Menopausal Status:                               |                      |                                       |                                   |                                    |                      |                         |                                  |
| - Pre-menopausal                                 | 115 (51%)            | 30 (53%)                              | 5 (56%)                           | 3 (30%)                            | 2 (25%)              | 30 (53%)                | 43 (52%)                         |
| - Post-menopausal                                | 72 (32%)             | 13 (23%)                              | 2 (22%)                           | 6 (60%)                            | 4 (50%)              | 17 (30%)                | 32 (39%)                         |
| - Not Sure                                       | 37 (17%)             | 14 (25%)                              | 2 (22%)                           | 1 (10%)                            | 2 (25%)              | 10 (18%)                | 8 (9%)                           |
| Use of Hormone Replacement Therapy               | 12 (6%)              | 3 (5%)                                | 0 (0%)                            | 0 (0%)                             | 1 (13%)              | 0 (0%)                  | 10 (6%)                          |
| Diabetes                                         | 15 (7%)              | 3 (5%)                                | 0 (0%)                            | 1 (10%)                            | 0 (0%)               | 7 (12%)                 | 4 (5%)                           |
| Heart Disease                                    | 1 (0%)               | 1 (2%)                                | 0 (0%)                            | 0 (0%)                             | 0 (0%)               | 0 (0%)                  | 0 (0%)                           |
| Hypertension                                     | 50 (22%)             | 6 (11%)                               | 1 (11%)                           | 2 (20%)                            | 4 (50%)              | 17 (30%)                | 20 (24%)                         |
| Urine Dipstick: (N=223)                          |                      |                                       |                                   |                                    |                      |                         | (N=82)                           |
| - White Blood Cells (WBC)                        | 0 (0%)               | 0 (0%)                                | 0 (0%)                            | 0 (0%)                             | 0 (0%)               | 0 (0%)                  | 0 (0%)                           |
| - Nitrites                                       | 0 (0%)               | 0 (0%)                                | 0 (0%)                            | 0 (0%)                             | 0 (0%)               | 0 (0%)                  | 0 (0%)                           |
| - Red Blood Cells (RBC)                          | 11 (5%)              | 5 (9%)                                | 1 (11%)                           | 0 (0%)                             | 0 (0%)               | 3 (5%)                  | 2 (2%)                           |
| Standard Urine Culture (SUC)-Positive            | 13 (6%)              | 1 (2%)                                | 1 (11%)                           | 8 (80%)<br>[<0.001] <sup>b</sup>   | 1 (13%)              | 1 (2%)                  | 1 (1%)<br>[0.03] <sup>b</sup>    |

Chi-Square Test used unless otherwise indicated. Fisher's Exact Test used when appropriate. SD = Standard Deviation. IQR = Interquartile Range. Only p-values ≤ 0.05 are shown (bold and highlighted).

a – Independent T test; b – Fisher's Exact Test; c – Wilcoxon Rank Sum Test; d – One-way ANOVA

# – The family Bifidobacterium includes the genus *Gardnerella*; the family Enterobacteriaceae includes the genus *Escherichia*.

\* – "Other" Urotype includes any additional urotypes present in < 5 samples in the Total Cohort

**Table S2.** Patient/clinical variables and microbiota composition by menopausal status

| <b>Patient and Clinical Variables and Culture Urotypes</b> | <b>Applicable Responses (N=187)</b> | <b>Pre-Menopausal (N = 115)</b> | <b>Post-Menopausal (N=72)</b> | <b>p-value</b>               |
|------------------------------------------------------------|-------------------------------------|---------------------------------|-------------------------------|------------------------------|
| Age (years), mean (SD)                                     | 49 (14)                             | 42 (11)                         | 59 (12)                       | <b>&lt;0.001<sup>a</sup></b> |
| Race:                                                      |                                     |                                 |                               | <b>0.04<sup>d</sup></b>      |
| -White/Caucasian                                           | 126 (67%)                           | 72 (63%)                        | 54 (75%)                      | 0.08                         |
| -Black/African American                                    | 45 (24%)                            | 30 (26%)                        | 15 (21%)                      | 0.41                         |
| -Asian                                                     | 8 (4%)                              | 6 (5%)                          | 2 (3%)                        | 0.71 <sup>b</sup>            |
| -NHPI                                                      | 0 (0%)                              | 0 (0%)                          | 0 (0%)                        | -                            |
| -Other                                                     | 8 (4%)                              | 7 (6%)                          | 1 (1%)                        | 0.16 <sup>b</sup>            |
| Ethnicity:                                                 |                                     |                                 |                               |                              |
| -Hispanic or Latina                                        | 20 (11%)                            | 17 (15%)                        | 3 (4%)                        |                              |
| -Not Hispanic or Latina                                    | 167 (89%)                           | 98 (85%)                        | 69 (96%)                      | <b>0.02</b>                  |
| Urotypes:                                                  |                                     |                                 |                               |                              |
| - <i>Lactobacillus</i>                                     | 35 (19%)                            | 22 (19%)                        | 13 (18%)                      | 0.85                         |
| - <i>Gardnerella</i>                                       | 10 (5%)                             | 8 (7%)                          | 2 (3%)                        | 0.32 <sup>b</sup>            |
| - <i>Streptococcus</i>                                     | 18 (10%)                            | 10 (9%)                         | 8 (11%)                       | 0.59                         |
| - <i>Escherichia</i>                                       | 6 (3%)                              | 0 (0%)                          | 6 (8%)                        | <b>0.003<sup>b</sup></b>     |
| -Other*                                                    | 16 (9%)                             | 9 (8%)                          | 7 (10%)                       | 0.65                         |
| -Mixed                                                     | 10 (5%)                             | 7 (6%)                          | 3 (4%)                        | 0.74 <sup>b</sup>            |
| -Culture Negative                                          | 92 (49%)                            | 59 (51%)                        | 33 (46%)                      | 0.47                         |
| BMI (kg/m <sup>2</sup> ), mean (SD)                        | 29.84 (7.71)                        | 28.99 (7.46)                    | 31.20 (7.98)                  | <b>0.03<sup>a</sup></b>      |
| Vaginal Parity, median (IQR)                               | 2 (0-3)                             | 2 (0-3)                         | 1 (0-3)                       | <b>0.10<sup>c</sup></b>      |
| Engage in Vaginal Intercourse (N=146)                      | 72 (62%)                            | 67 (83%)<br>(N=81)              | 5 (14%)<br>(N=36)             | <b>&lt;0.001</b>             |
| Use of Hormone Replacement Therapy                         | 9 (5%)                              | 5 (4%)                          | 4 (6%)                        | 0.71                         |
| Diabetes                                                   | 13 (7%)                             | 4 (3%)                          | 9 (13%)                       | <b>0.03<sup>b</sup></b>      |
| Heart Disease                                              | 1 (0%)                              | 1 (1%)                          | 0 (0%)                        | 1.00 <sup>b</sup>            |
| Hypertension                                               | 46 (25%)                            | 18 (16%)                        | 28 (39%)                      | <b>&lt;0.001</b>             |
| Urine Dipstick: (N=223)                                    |                                     | (N=114)                         |                               |                              |
| - White Blood Cells (WBC)                                  | 0 (0%)                              | 0 (0%)                          | 0 (0%)                        | -                            |
| - Nitrites                                                 | 0 (0%)                              | 0 (0%)                          | 0 (0%)                        | -                            |
| - Red Blood Cells (RBC)                                    | 5 (3%)                              | 4 (4%)                          | 1 (1%)                        | 0.65 <sup>b</sup>            |
| Standard Urine Culture (SUC)- Positive                     | 12 (6%)                             | 4 (3%)                          | 8 (11%)                       | <b>0.06<sup>b</sup></b>      |

Chi-Square Test used unless otherwise indicated. SD = Standard Deviation. IQR = Interquartile Range.

a – Independent T test; b – Fisher’s Exact Test; c – Wilcoxon Rank Sum Test; d – One-way ANOVA

\* – “Other” Urotype includes any additional urotypes present in < 5 samples in the Total Cohort

p-values <0.05 are bolded and highlighted.

**Table S3.** Patient/clinical variables by vaginal parity

| Patient and Clinical Variables and Culture Urotypes | Total Cohort (N=224) | Vaginal Parity "0" (N=73)           | Vaginal Parity "1" (N=30) | Vaginal Parity "2" (N=60)    | Vaginal Parity "3" (N=43) | Vaginal Parity "4-9" (N=18) |
|-----------------------------------------------------|----------------------|-------------------------------------|---------------------------|------------------------------|---------------------------|-----------------------------|
| Age (years), mean (SD) <sup>a</sup>                 | 48 (14)              | 42 (13) [ <b>&lt;0.001</b> ]        | 47 (14)                   | 51 (12) [ <b>0.03</b> ]      | 51 (12) [ <b>0.04</b> ]   | 55 (16) [ <b>0.01</b> ]     |
| Race:                                               |                      |                                     |                           |                              |                           |                             |
| -White/Caucasian                                    | 148 (66%)            | 49 (67%)                            | 23 (77%)                  | 39 (65%)                     | 27 (63%)                  | 10 (55%)                    |
| -Black/African American                             | 53 (24%)             | 17 (23%)                            | 6 (20%)                   | 13 (22%)                     | 11 (26%)                  | 6 (33%)                     |
| -Asian                                              | 9 (4%)               | 5 (7%)                              | 0 (0%)                    | 2 (3%)                       | 2 (7%)                    | 0 (0%)                      |
| -NHPI                                               | 1 (0%)               | 0 (0%)                              | 0 (0%)                    | 0 (0%)                       | 0 (0%)                    | 1 (6%)                      |
| -Other                                              | 13 (6%)              | 2 (3%)                              | 1 (3%)                    | 6 (10%)                      | 3 (7%)                    | 1 (6%)                      |
| Ethnicity:                                          |                      |                                     |                           |                              |                           |                             |
| -Hispanic or Latina                                 | 28 (12%)             | 11 (15%)                            | 3 (10%)                   | 8 (13%)                      | 5 (12%)                   | 1 (6%)                      |
| -Not Hispanic or Latina                             | 196 (88%)            | 62 (85%)                            | 27 (90%)                  | 52 (87%)                     | 38 (88%)                  | 17 (94%)                    |
| Culture Urotypes:                                   |                      | [ <b>0.04</b> ] <sup>d</sup>        |                           |                              |                           |                             |
| - <i>Lactobacillus</i>                              | 42 (19%)             | 18 (25%)                            | 5 (17%)                   | 9 (15%)                      | 6 (14%)                   | 4 (22%)                     |
| - <i>Gardnerella</i>                                | 12 (5%)              | 9 (12%) [ <b>0.001</b> ]            | 2 (7%)                    | 1 (2%)                       | 0 (0%)                    | 0 (0%)                      |
| - <i>Streptococcus</i>                              | 21 (9%)              | 5 (7%)                              | 5 (17%)                   | 6 (10%)                      | 3 (7%)                    | 2 (12%)                     |
| - <i>Escherichia</i>                                | 8 (4%)               | 1 (1%)                              | 0 (0%)                    | 4 (7%)                       | 3 (7%)                    | 0 (0%)                      |
| -Other*                                             | 19 (8%)              | 2 (3%) [ <b>0.04</b> ] <sup>b</sup> | 4 (13%)                   | 7 (12%)                      | 4 (9%)                    | 2 (12%)                     |
| -Mixed                                              | 13 (6%)              | 5 (7%)                              | 1 (3%)                    | 3 (5%)                       | 2 (7%)                    | 2 (12%)                     |
| -Culture Negative                                   | 109 (49%)            | 33 (45%)                            | 13 (43%)                  | 30 (50%)                     | 25 (58%)                  | 8 (44%)                     |
| BMI (kg/m <sup>2</sup> ), mean (SD) <sup>a</sup>    | 29.96 (7.73)         | 31.54 (9.42) [ <b>0.02</b> ]        | 29.91 (7.67)              | 29.65 (6.76)                 | 28.29 (6.37)              | 28.6 (5.37)                 |
| Engage in Vaginal Intercourse (N=146)               | 92 (63%)             | (N=42) 29 (69%)                     | (N=22) 11 (50%)           | (N=39) 26 (67%)              | (N=31) 21 (68%)           | (N=12) 5 (42%)              |
| Menopausal Status:                                  |                      | [ <b>0.003</b> ] <sup>d</sup>       |                           | [ <b>0.04</b> ] <sup>d</sup> |                           |                             |
| - Pre-menopausal                                    | 115 (51%)            | 47 (64%) [ <b>0.007</b> ]           | 15 (50%)                  | 24 (40%) [ <b>0.04</b> ]     | 21 (49%)                  | 8 (44%)                     |
| - Post-menopausal                                   | 72 (32%)             | 20 (27%)                            | 9 (30%)                   | 23 (38%)                     | 12 (28%)                  | 8 (44%)                     |
| - Not Sure                                          | 37 (17%)             | 6 (8%) [ <b>0.02</b> ]              | 6 (20%)                   | 13 (22%)                     | 10 (23%)                  | 2 (12%)                     |
| Use of Hormone Replacement Therapy                  | 12 (6%)              | 5 (7%)                              | 2 (7%)                    | 1 (2%)                       | 3 (7%)                    | 1 (6%)                      |
| Diabetes                                            | 15 (7%)              | 5 (7%)                              | 3 (10%)                   | 4 (7%)                       | 3 (7%)                    | 0 (0%)                      |
| Heart Disease                                       | 1 (0%)               | 0 (0%)                              | 0 (0%)                    | 0 (0%)                       | 0 (0%)                    | 1 (6%)                      |
| Hypertension                                        | 50 (22%)             | 14 (19%)                            | 9 (30%)                   | 12 (20%)                     | 6 (14%)                   | 9 (50%) [ <b>0.003</b> ]    |
| Urine Dipstick: (N=223)                             |                      | (N=72)                              |                           |                              |                           |                             |
| - White Blood Cells (WBC)                           | 0 (0%)               | 0 (0%)                              | 0 (0%)                    | 0 (0%)                       | 0 (0%)                    | 0 (0%)                      |
| - Nitrites                                          | 0 (0%)               | 0 (0%)                              | 0 (0%)                    | 0 (0%)                       | 0 (0%)                    | 0 (0%)                      |
| - Red Blood Cells (RBC)                             | 11 (5%)              | 5 (7%)                              | 2 (7%)                    | 2 (3%)                       | 1 (2%)                    | 1 (6%)                      |
| Standard Urine Culture (SUC)-Positive               | 13 (6%)              | 4 (5%)                              | 1 (3%)                    | 5 (8%)                       | 3 (7%)                    | 0 (0%)                      |

Chi-Square Test used unless otherwise indicated. Fisher's Exact Test used when appropriate. SD = Standard Deviation. IQR = Interquartile Range.

Only p-values ≤ 0.05 are shown (bold and highlighted).

a – Independent T test; b – Fisher's Exact Test; c – Wilcoxon Rank Sum Test; d – One-way ANOVA

\* – "Other" Urotype includes any additional urotypes present in < 5 samples in the Total Cohort

**Table S4.** Patient/clinical variable between women who do and do not engage in vaginal intercourse

| Patient and Clinical Variables and Culture Urotypes | Responded to Question (N=146) | “Yes” (N = 92) | “No” (N=54)  | p-value                      |
|-----------------------------------------------------|-------------------------------|----------------|--------------|------------------------------|
| Age (years), mean (SD)                              | 47 (13)                       | 42 (9)         | 53 (14)      | <b>&lt;0.001<sup>a</sup></b> |
| Race:                                               |                               |                |              |                              |
| -White/Caucasian                                    | 93 (64%)                      | 56 (61%)       | 37 (69%)     | <b>0.60<sup>d</sup></b>      |
| -Black/African American                             | 36 (25%)                      | 24 (26%)       | 12 (22%)     |                              |
| -Asian                                              | 5 (3%)                        | 5 (5%)         | 0 (0%)       |                              |
| -NHPI                                               | 1 (1%)                        | 0 (0%)         | 1 (2%)       |                              |
| -Other                                              | 11 (8%)                       | 7 (8%)         | 4 (7%)       |                              |
| Ethnicity:                                          |                               |                |              |                              |
| -Hispanic or Latina                                 | 20 (14%)                      | 15 (16%)       | 5 (9%)       | <b>0.23</b>                  |
| -Not Hispanic or Latina                             | 126 (86%)                     | 77 (84%)       | 49 (91%)     |                              |
| Culture Urotypes:                                   |                               |                |              |                              |
| - <i>Lactobacillus</i>                              | 27 (18%)                      | 19 (20%)       | 8 (15%)      | <b>0.38</b>                  |
| - <i>Gardnerella</i>                                | 9 (6%)                        | 7 (8%)         | 2 (4%)       | <b>0.49<sup>b</sup></b>      |
| - <i>Streptococcus</i>                              | 13 (9%)                       | 8 (9%)         | 5 (9%)       | <b>0.91</b>                  |
| - <i>Escherichia</i>                                | 6 (4%)                        | 0 (0%)         | 6 (11%)      | <b>0.002<sup>b</sup></b>     |
| -Other*                                             | 7 (5%)                        | 4 (4%)         | 3 (6%)       | <b>0.71<sup>b</sup></b>      |
| -Mixed                                              | 9 (6%)                        | 8 (9%)         | 1 (2%)       | <b>0.09<sup>b</sup></b>      |
| -Culture Negative                                   | 75 (51%)                      | 46 (50%)       | 29 (54%)     | <b>0.67</b>                  |
| BMI (kg/m <sup>2</sup> ), mean (SD)                 | 29.91 (7.52)                  | 28.98 (7.18)   | 31.49 (7.89) | <b>0.03<sup>a</sup></b>      |
| Vaginal Parity, median (IQR)                        | 2 (0-3)                       | 2 (0-3)        | 2 (1-3)      | <b>0.49<sup>c</sup></b>      |
| Menopausal Status:                                  |                               |                |              | <b>0.002<sup>d</sup></b>     |
| - Pre-menopausal                                    | 81 (55%)                      | 67 (73%)       | 14 (26%)     | <b>&lt;0.001</b>             |
| - Post-menopausal                                   | 36 (25%)                      | 5 (5%)         | 31 (57%)     | <b>&lt;0.001</b>             |
| - Not Sure                                          | 29 (20%)                      | 20 (22%)       | 9 (17%)      | <b>0.46</b>                  |
| Use of Hormone Replacement Therapy                  | 8 (5%)                        | 4 (4%)         | 4 (7%)       | <b>0.47<sup>b</sup></b>      |
| Diabetes                                            | 10 (7%)                       | 5 (5%)         | 5 (9%)       | <b>0.38</b>                  |
| Heart Disease                                       | 0 (0%)                        | 0 (0%)         | 0 (0%)       | -                            |
| Hypertension                                        | 29 (20%)                      | 10 (11%)       | 19 (35%)     | <b>&lt;0.001</b>             |
| Urine Dipstick:                                     | (N=145)                       | (N=91)         |              |                              |
| - White Blood Cells (WBC)                           | 0 (0%)                        | 0 (0%)         | 0 (0%)       | -                            |
| - Nitrites                                          | 0 (0%)                        | 0 (0%)         | 0 (0%)       | -                            |
| - Red Blood Cells (RBC)                             | 7 (5%)                        | 6 (7%)         | 1 (2%)       | <b>0.26<sup>b</sup></b>      |
| Standard Urine Culture (SUC)-Positive               | 9 (6%)                        | 3 (3%)         | 6 (11%)      | <b>0.08<sup>b</sup></b>      |

Chi-Square Test used unless otherwise indicated. SD = Standard Deviation. IQR = Interquartile Range.

a – Independent T test; b – Fisher’s Exact Test; c – Wilcoxon Rank Sum Test; d – One-way ANOVA

\* – “Other” Urotype includes any additional urotypes present in < 5 samples in the Total Cohort

p-values <0.05 are bolded and highlighted.
